# Supplementary material for: Low-Intensity Blue Light Exposure Reduces Melanopsin Expression in Intrinsically Photosensitive Retinal Ganglion Cells and Damages Mitochondria in Retinal Ganglion Cells in Wistar Rats
Source: MDPI journal article supplement (doi:10.3390/cells12071014), 2023-03-26
Supplement: s1 [file s1]

**Table S1. Counts of TUNEL- positive nuclei in the outer nuclear layer of control rats and of rats exposed to blue light.**

| Section | Short-term exposure |   |   |   |   |    |   |   |   | Long -term exposure |    |    |    |    |    |    |    |    | Control exposure |   |   |   |   |   |   |   |   |
|---------|---------------------|---|---|---|---|----|---|---|---|---------------------|----|----|----|----|----|----|----|----|------------------|---|---|---|---|---|---|---|---|
|         | Animal              |   |   |   |   |    |   |   |   | Animal              |    |    |    |    |    |    |    |    | Animal           |   |   |   |   |   |   |   |   |
|         | 1                   | 2 | 3 | 4 | 5 | 6  | 7 | 8 | 9 | 1                   | 2  | 3  | 4  | 5  | 6  | 7  | 8  | 9  | 1                | 2 | 3 | 4 | 5 | 6 | 7 | 8 | 9 |
| 1       | 1                   | 0 | 2 | 1 | 0 | 2  | 1 | 1 | 1 | 9                   | 5  | 4  | 4  | 6  | 6  | 3  | 2  | 4  | 0                | 0 | 0 | 0 | 1 | 0 | 0 | 0 | 0 |
| 2       | 1                   | 1 | 1 | 2 | 1 | 0  | 2 | 0 | 0 | 4                   | 4  | 6  | 5  | 5  | 6  | 4  | 4  | 3  | 1                | 0 | 0 | 0 | 0 | 1 | 0 | 0 | 0 |
| 3       | 0                   | 0 | 0 | 0 | 0 | 4  | 0 | 2 | 1 | 6                   | 7  | 2  | 8  | 4  | 4  | 8  | 6  | 8  | 0                | 1 | 0 | 0 | 0 | 0 | 0 | 1 | 0 |
| 4       | 1                   | 2 | 3 | 1 | 2 | 1  | 0 | 1 | 0 | 7                   | 3  | 7  | 7  | 6  | 3  | 6  | 3  | 7  | 0                | 0 | 0 | 1 | 0 | 0 | 0 | 0 | 0 |
| 5       | 2                   | 3 | 0 | 0 | 0 | 0  | 1 | 1 | 0 | 6                   | 8  | 4  | 6  | 8  | 6  | 4  | 7  | 6  | 0                | 0 | 1 | 0 | 0 | 0 | 0 | 0 | 0 |
| 6       | 2                   | 1 | 1 | 2 | 3 | 0  | 0 | 0 | 4 | 3                   | 4  | 6  | 9  | 4  | 5  | 6  | 9  | 6  | 0                | 0 | 0 | 1 | 0 | 0 | 0 | 0 | 0 |
| 7       | 1                   | 1 | 0 | 0 | 0 | 3  | 1 | 3 | 0 | 6                   | 5  | 5  | 2  | 6  | 5  | 8  | 3  | 7  | 1                | 1 | 0 | 0 | 0 | 0 | 0 | 0 | 0 |
| 8       | 0                   | 0 | 1 | 1 | 1 | 0  | 3 | 0 | 1 | 5                   | 8  | 7  | 6  | 7  | 3  | 9  | 8  | 4  | 0                | 0 | 1 | 0 | 0 | 1 | 0 | 0 | 0 |
| SUM     | 8                   | 8 | 8 | 7 | 7 | 10 | 8 | 8 | 7 | 46                  | 44 | 41 | 47 | 46 | 38 | 48 | 42 | 45 | 2                | 2 | 2 | 2 | 1 | 2 | 0 | 1 | 0 |
| MEAN    | 7.888               |   |   |   |   |    |   |   |   | 44.11               |    |    |    |    |    |    |    |    | 1.33             |   |   |   |   |   |   |   |   |
| SD      | 0.927               |   |   |   |   |    |   |   |   | 3.21                |    |    |    |    |    |    |    |    | 0.86             |   |   |   |   |   |   |   |   |
